# Supplementary material
Source: HighWire-hosted journal article supplement (http://www.qdcxjkg.com/highwire/filestream/113816/field_highwire_adjunct_files/0/ERJ-00212-2012_Disclosures.pdf)
Supplement: ERJ-00212-2012_Disclosures.pdf [file ERJ-00212-2012_Disclosures.pdf]

D.S. Postma has received an unrestricted educational grant for research from AstraZeneca, Chiesi, GSK. Travel to ERS and/or ATS has been partially funded by AstraZeneca, Chiesi, GSK, Nycomed. Fees for consultancies were given to the University of Groningen by AZ, Boehringer Ingelheim, Chiesi, GSK, Nycomed and TEVA.
